# Supplementary material
Source: Springer Nature journal article supplement (https://www.springermedizin.de/resource/supplementary/13058_2010_2524_MOESM12_ESM.pdf/9701606)
Supplement: MOESM12 [file 9701606]

# Luminal Progenitor

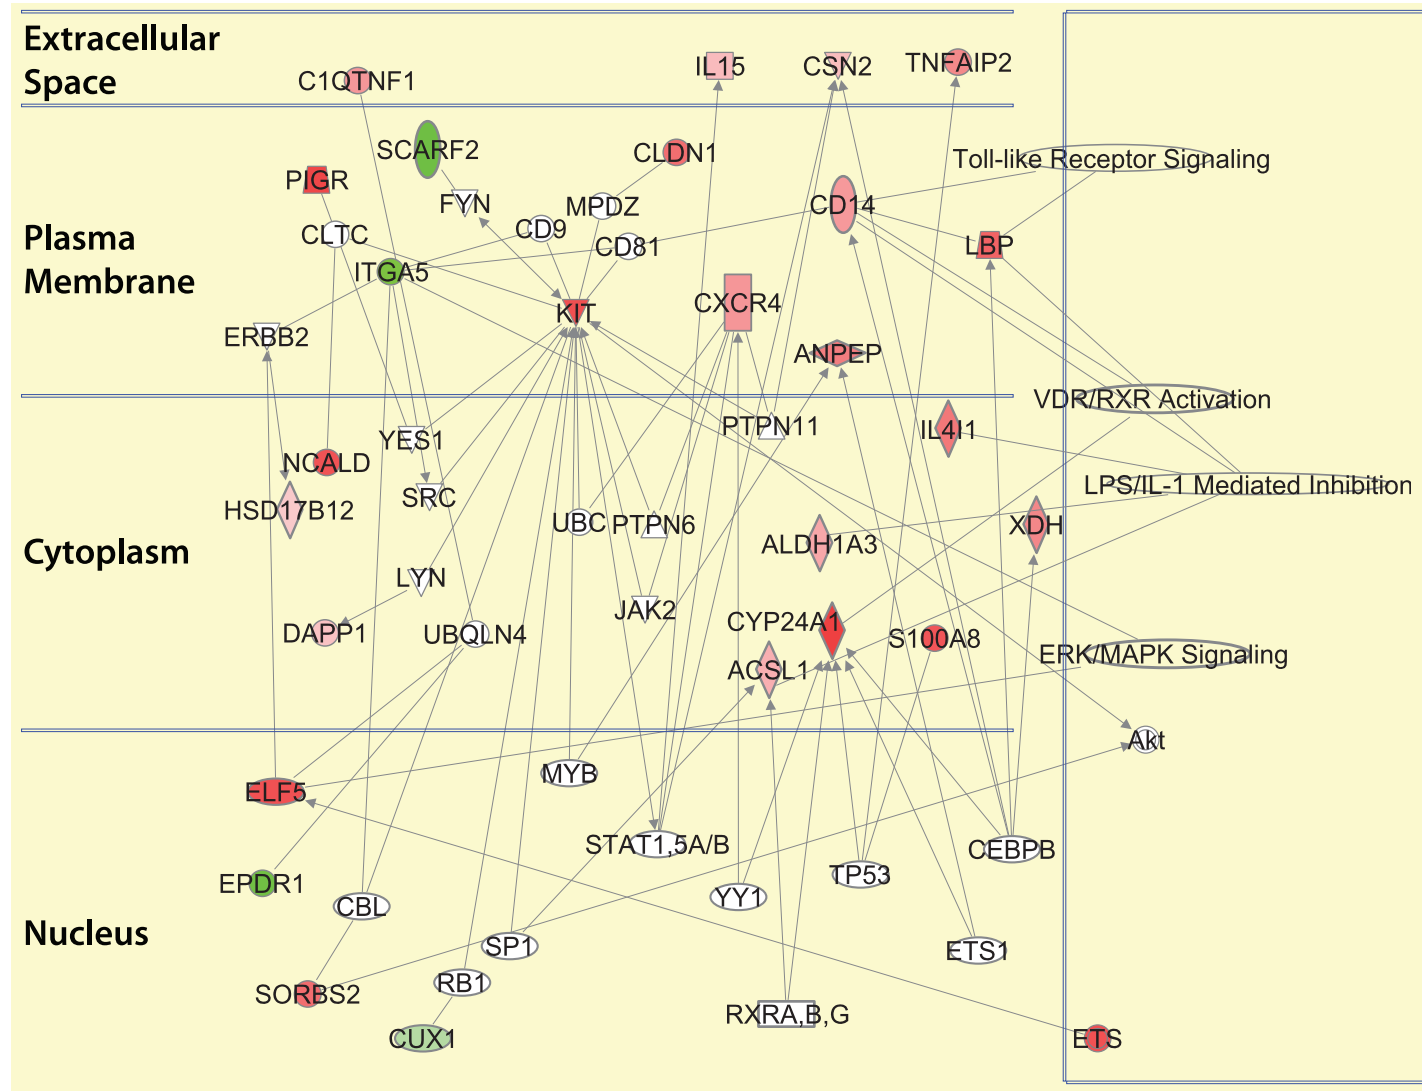

- Symbols**
- Direct interaction
  - Acts on
  - Cytokine
  - ◻ Growth factor
  - △ Transporter
  - ▭ Ligand-dependent nuclear receptor
  - ▭ G-protein coupled receptor
  - ◇ Peptidase
  - ◇ Enzyme
  - ▽ Kinase
  - △ Phosphatase
  - Transcription factor
  - Transmembrane receptor
  - Other
